# Supplementary material for: Carotenoid Accumulation in Common and Orange-Muscle Mutant of Abalone, Haliotis gigantea, Fed with Different Macroalgae
Source: Hindawi journal article supplement (doi:10.1155/2022/9287594), 2022-12-30

**Table S1.** The carotenoid content in muscles of *H. gigantea* with different color under various diets after 12 months.

| **Diets** | **Abalones** | **β-carotene (μg/g)** | **Zeaxanthin (μg/g)** | **Fucoxanthin (μg/g)** |
| --- | --- | --- | --- | --- |
| **GL** | **OA** | **25.42 ± 5.33a** | **461.37 ± 220.51a** | **6.73 ± 3.00a** |
| **CA** | **6.35 ± 3.73b** | **4.67 ± 3.51b** | **0.60 ± 0.47b** |
| **FK** | **OA** | **13.69 ± 4.61a** | **25.58 ± 14.50a** | **2.73 ± 1.32a** |
| **CA** | **3.51 ± 1.41b** | **2.74 ± 1.97b** | **0.72 ± 0.35b** |
| **DK** | **OA** | **9.34 ± 2.36a** | **27.81 ± 24.86a** | **3.2 ± 2.38a** |
| **CA** | **1.96 ± 0.97b** | **0.32 ± 0.08b** | **0.26 ± 0.11b** |

**Note: Different letters in the same column show significant difference (*P* < 0.01).**

**Figure S1. I****ncreases in the amount of carotenoid in *H. gigantea* muscles with different colors under various diets after 12 months.**

**Figure S2. Growth traits of *H. gigantea* with different colors under various diets after 12 months.**

**Figure S1**


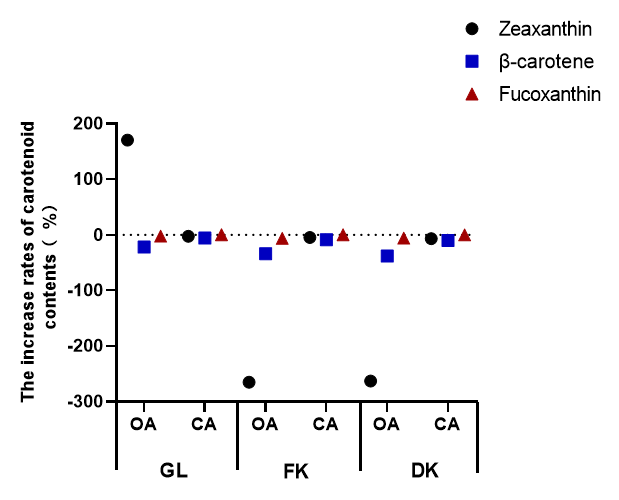


**Figure S2**


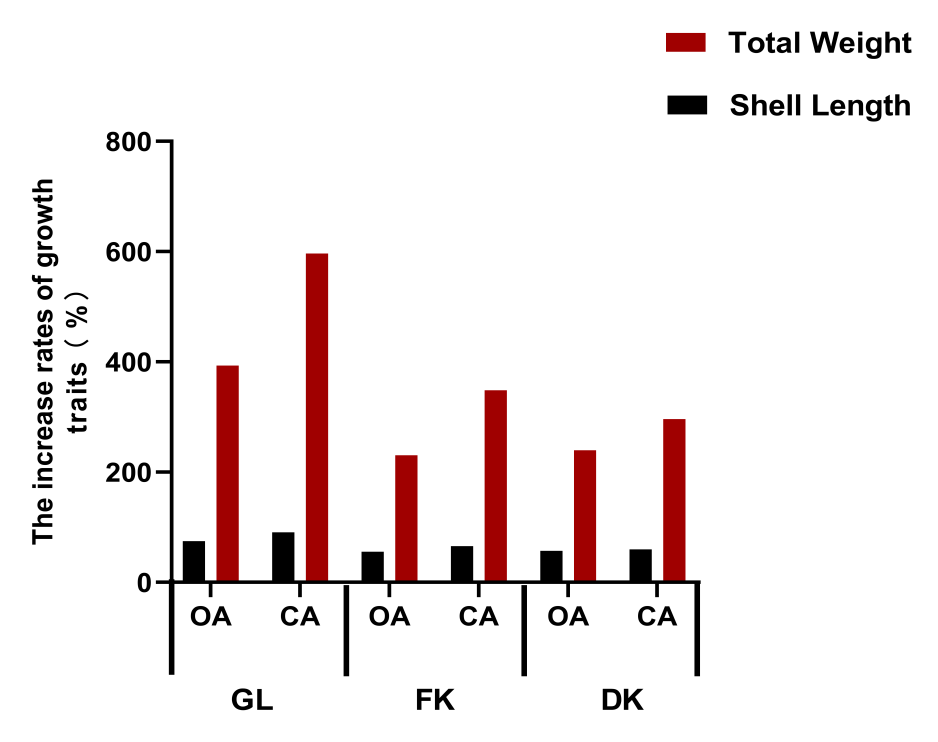

Supplement: f1 [file 9287594.f1.docx]
